# Supplementary material for: Differentially Detectable Mycobacterium tuberculosis Cells in Sputum from Treatment-Naive Subjects in Haiti and Their Proportionate Increase after Initiation of Treatment
Source: PubMed Central journal article supplement (PMC6247085; doi:10.1128/mbio.02192-18), 2018-11-20

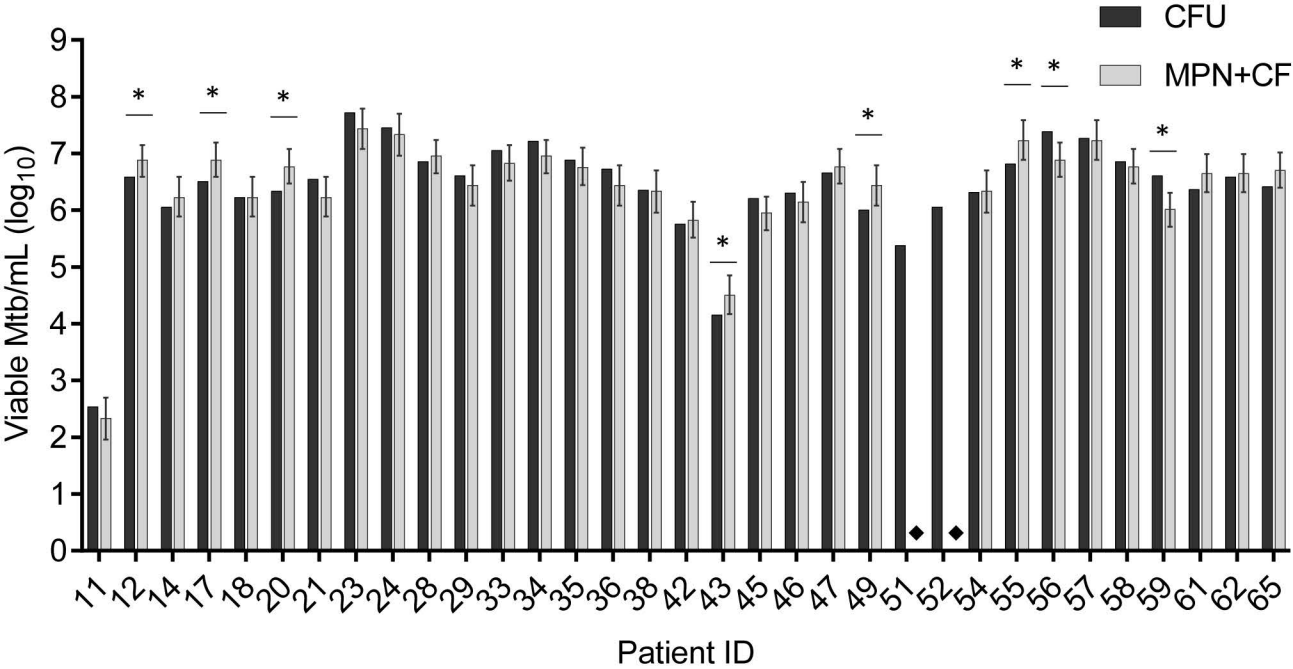

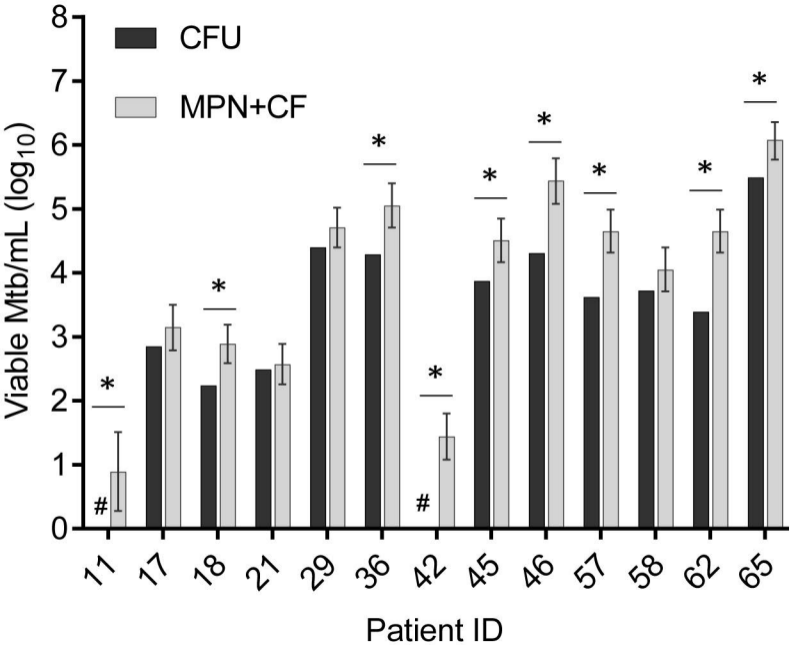

Supplement: mbo006184173sf2.pdf [file mbo006184173sf2.pdf]
